# Supplementary material for: High-Efficiency CsPbBr3 Light-Emitting Diodes using One-Step Spin-Coating In Situ Dynamic Thermal Crystallization
Source: MDPI journal article supplement (doi:10.3390/mi14061104), 2023-05-24
Supplement: s1 [file s1]

Supplementary Materials

# High-Efficiency CsPbBr<sub>3</sub> Light-Emitting Diodes using One-Step Spin-Coating In Situ Dynamic Thermal Crystallization

Buyue Zhang <sup>1</sup>, Chen Chen <sup>2</sup> and Xinyu Chen <sup>1,\*</sup>

<sup>1</sup> College of Physics, Changchun University of Science and Technology, Changchun 130012, China; 2020200002@mails.cust.edu.cn

<sup>2</sup> College of Information Technology, Jilin Normal University, Siping 136000, China; chenchen@jlnu.edu.cn

\* Correspondence: chenxinyucust@163.com

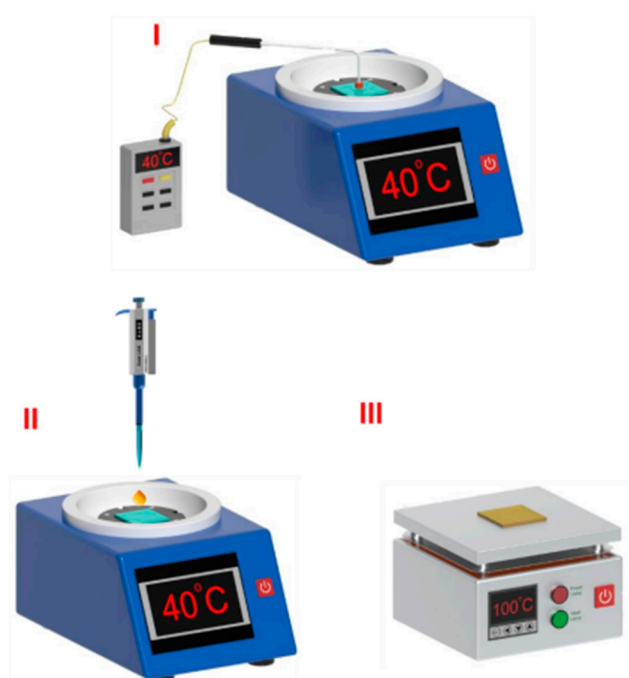

**Figure S1.** The fabrication process of one-step spin-coating in-situ thermally assisted crystallization process.

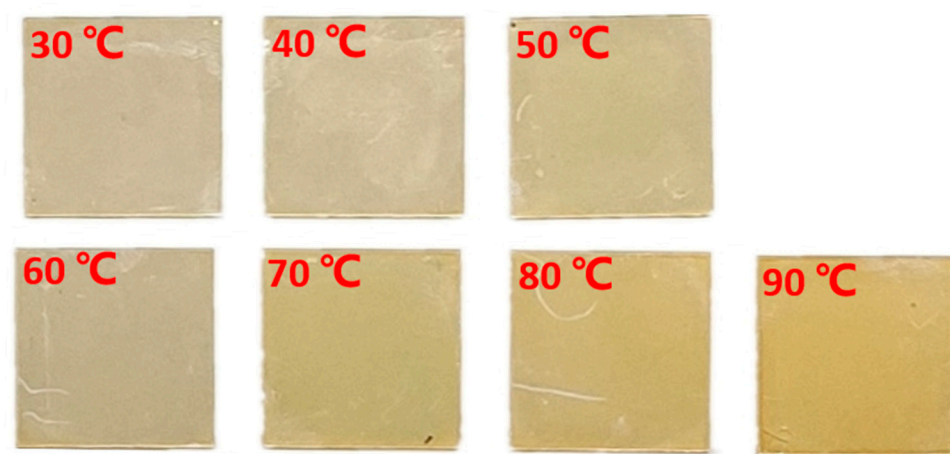

**Figure S2.** The color variation of perovskite film at different in situ heat-assisted crystallization temperatures.

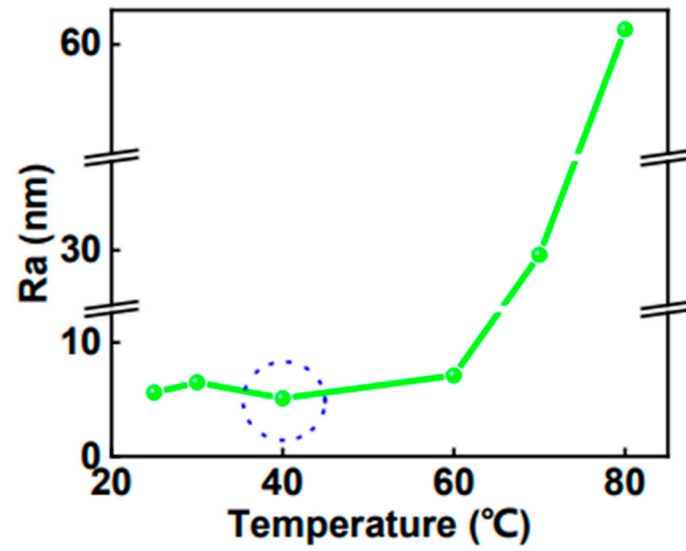

**Figure S3.** The roughness variation of perovskite film under different annealing temperature.

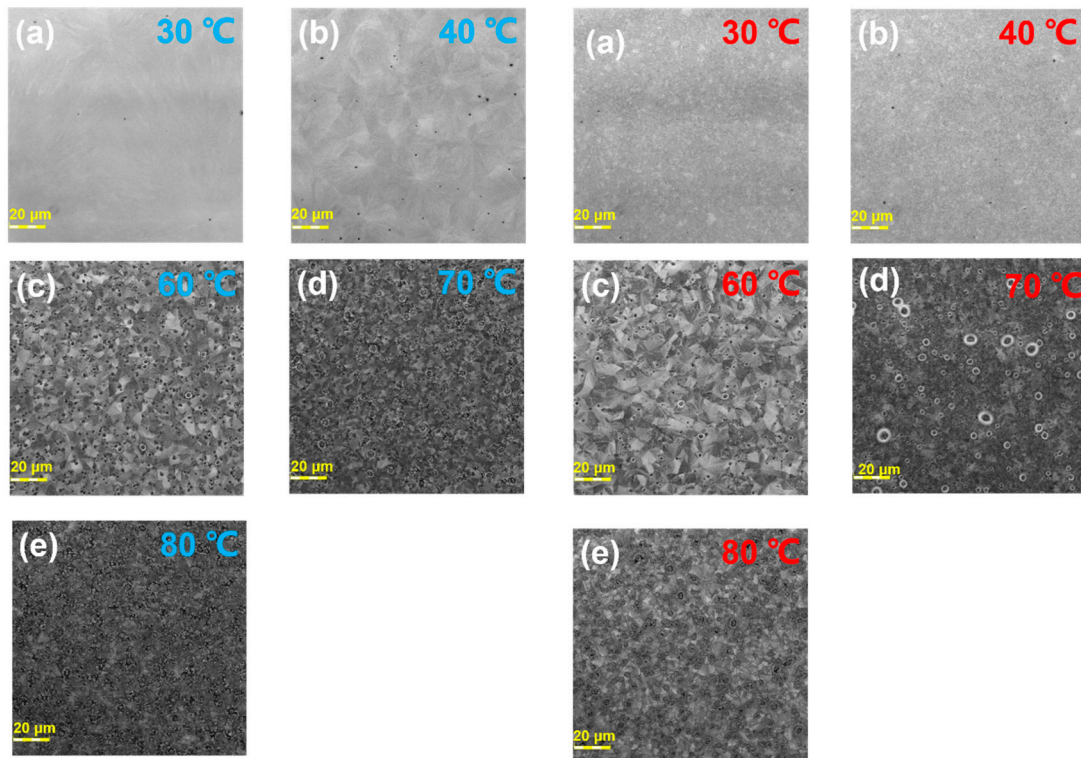

**Figure S4.** The laser confocal micrographs of unannealed and annealed CsPbBr<sub>3</sub> films at different in situ thermally assisted crystallization temperatures.

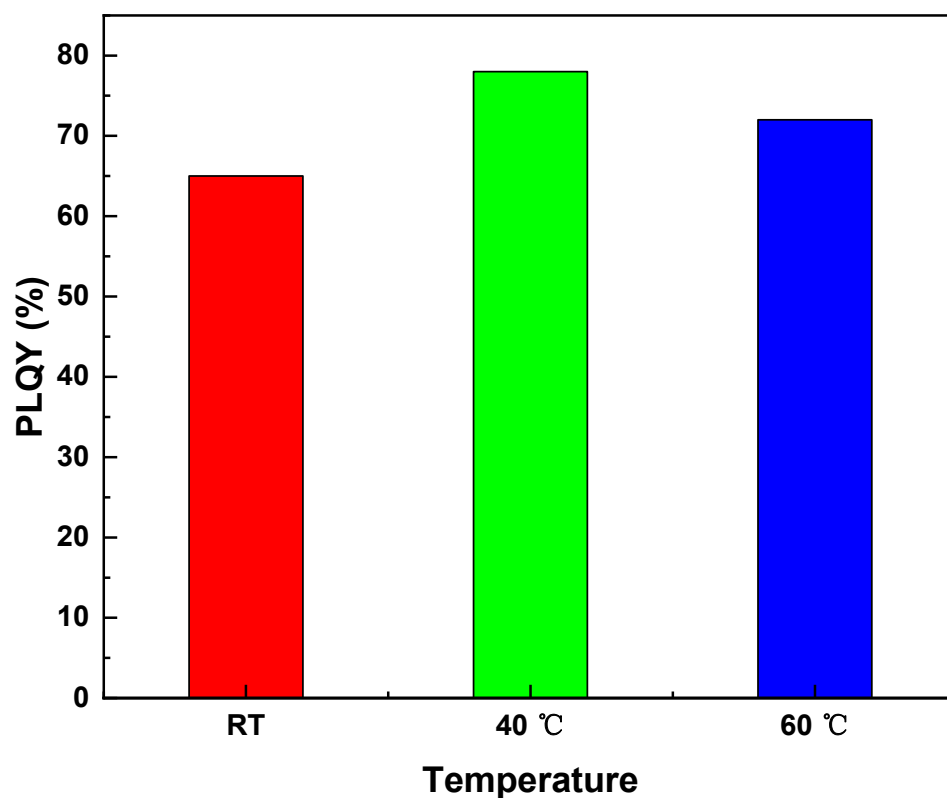

**Figure S5.** PLQY measurement of the perovskite film under different annealing temperature.

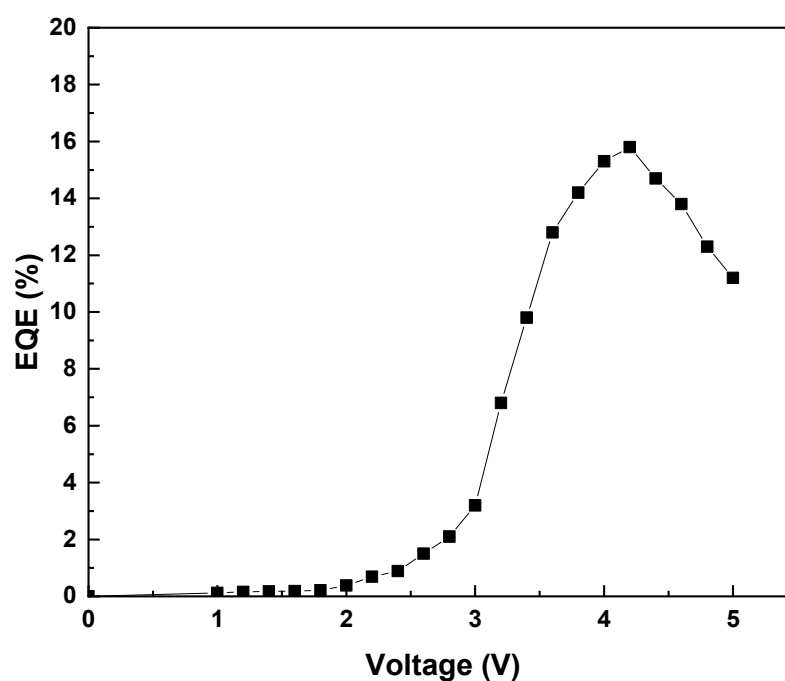

**Figure S6.** EQE measurement for the best performance PeLED device.

**Table S1.** The concentration of elements in the perovskite film.

| Element | Percentage |
|---------|------------|
| Cs      | 35.36%     |
| Pb      | 8.22 %     |
| Br      | 56.42 %    |
